# Supplementary material for: Analysis of the Caulobacter crescentus Zur regulon reveals novel insights in zinc acquisition by TonB-dependent outer membrane proteins
Source: PubMed Central journal article supplement (PMC4176598; doi:10.1186/1471-2164-15-734), 2014-08-28
Supplement: 12864_2014_6470_MOESM1_ESM.pdf [file 12864_2014_6470_MOESM1_ESM.pdf]

```

          *           20           *           40
EC_ZUR : -----MEKTTTQELIA-----QAEKICAQRN : 21
YP_ZUR : -----MNPINQEKLIA-----QAESLCCQRN : 21
XC_ZUR : MTKHTHTQTHDQEHACTAPHHVDDANSFVR----AVERACSERG : 41
PA_ZUR : -----MYKIAPKTPACQPHDHSQCVSTALA-----EADALCARQG : 36
CC_ZUR : -----MSMANAPSCGHDHNNHGVAGAALAAELDAAEARCAAAD : 38
CC_FUR : -----MDR-----LEKACIEKG : 12
SC_NUR : -----MVSTDWKSDFR-----QRG : 14

```

```

          *           60           *           80           *
EC_ZUR : VRLTPQRLEVLRLMSLQDGATISAYDLDLLREAEPQ--AKPPTVY : 64
YP_ZUR : VRLTPQRLEVLRLMAQQPGATISAYDLDLLRVAEPQ--AKPPTVY : 64
XC_ZUR : LRLTPIRANVLRLIADAGKPVKAYELLDWVREGKGVGADAPPTVY : 86
PA_ZUR : VRLTELRRRVLELVWQSHKPLGAYDILAVLSETDGR-RAAPPTVY : 80
CC_ZUR : QRLTAFRRRVLELLEAGQPVKAYDLISSFGGSGPP--AKPPTVY : 81
CC_FUR : MRMTDCRRVIARVLISSAEDHPDVEELHRRRAHAIDPH--ISIA TVY : 55
SC_NUR : YRLTPCRQLVLEAVDT-LEHATPDDILGEVRKTASG--INISTVY : 56

```

```

          100           *           120           *
EC_ZUR : RALDFLLEQGFVHKVESTNSYVLCHLFDQPTHTSAMFICDRCGAV : 109
YP_ZUR : RALDFLLEQGFVHVESANSYVLCHHFEEPTHTSALEFICDRCKIV : 109
XC_ZUR : RALDFLMANGFVHKLESVNAFVACHHPNSAQHSVPFLICDRCHSA : 131
PA_ZUR : RALDFLQENGLVHRIASLNAFVGCNNP-EHSHQGQFLICRTCHTA : 124
CC_ZUR : RALDFLEKQGFVHRIESLNAYVACRKE-ADGHAAAFICDCCGAT : 125
CC_FUR : RTVRLFEESGITERHDFRDGRS--RYEQSPDHHHDHLIDMKTGKV : 98
SC_NUR : RTLELEELGLVSHALG--HGAPTYHLADRHIIIHLVCRDCTNV : 99

```

```

          140           *           160           *           180
EC_ZUR : KEECAEGVEDIMHTLAAKMGFAIRHNVIEAHGLCAACVEVEACRH : 154
YP_ZUR : TERPTVGIIEEALAQLAKQSGFTLRHSVVEAHGLCTEGVVEACES : 154
XC_ZUR : VELED RDVVSQLEARAKALGFQPPAQTLEVHGLCAKCAAAG---- : 172
PA_ZUR : IELEQPDISRIVAGANSVGFVAVESQTVVVGLCGTCDRQKDA-- : 167
CC_ZUR : REIEP-KASAEIIAAGEAAGYALTGVTIEAHGLCADCRS----- : 163
CC_FUR : VEFVDEEIEALQHAIAKKLGYKLIDHRLLELYGMPLLE----- : 135
SC_NUR : IEADLSVAADFTAKLREQFGFDTDMKHFAIFGRCESCSLKGSTTD : 144

```

```

          *
EC_ZUR : PEQCQHDHHSVQVKKKPR : 171
YP_ZUR : HDDCEHDHSIVVKKK-- : 169
XC_ZUR : ----- : -
PA_ZUR : ----- : -
CC_ZUR : ----- : -
CC_FUR : ----- : -
SC_NUR : S----- : 145

```

Figure S1 – Amino acid alignment of *C. crescentus* Zur with other regulators of the Fur family. Uptake regulators for zinc (ZUR), iron (FUR) and nickel (NUR) are shown. The GenBank no. and abbreviations are as follows: EC, *Escherichia coli* [AAC77016]; YP, *Yersinia pestis* [AAS60741]; XC, *Xanthomonas campestris* [AAY48498]; PA, *Pseudomonas aeruginosa* [AAG08884]; CC, *Caulobacter crescentus* [Zur, AAK22344; Fur, AAK22044]; SC, *Streptomyces coelicolor* [CAB94084].
